# The impact of the “World’s 25 Most Endangered Primates” list on scientific publications and media

Daphné Kerhoas\*<sup>†1</sup>, Alberto Acerbi<sup>†2</sup>, Amanda D. Webber<sup>1</sup>, Gráinne McCabe<sup>1</sup>,  
Russell A. Mittermeier<sup>3</sup>, and Christoph Schwitzer<sup>1</sup>

<sup>1</sup>Bristol Zoological Society, Bristol, United Kingdom

<sup>2</sup>School of Innovation Science, Eindhoven University of Technology, The Netherlands

<sup>3</sup>Global Wildlife Conservation, Austin, Texas, USA

## Abstract

Assessing the impact of conservation campaigns is of high importance for optimizing the use of limited resources. Lists of threatened species are often used as media outreach tools, but their usefulness is rarely tested. We investigated whether the inclusion of a species in the list “World’s 25 Most Endangered Primates”, published biannually by the International Primatological Society, the International Union for Conservation of Nature’s Species Survival Commission Primate Specialist Group, and Conservation International from 2000, had an effect both on scientific publications and on the general public. We analyzed a database of 40 million articles from major scientific publishers (Elsevier, Springer, Nature, Plos, Pubmed, Biomed Central) finding an increase in the number of papers mentioning a species after its inclusion in the list. We also analyzed media penetration (data from Google News), and online interest (data from Google Blogs, Twitter, and Google Trends), collecting daily data for one month before and one after the official launch of the 2014-2016 list (24<sup>th</sup> November 2015). The results show a short spike of interest on Google News and Twitter but no long term effect, indicating a limited effect on the general public. Our results are important for the understanding of the impact of current conservation campaigns and to provide strategies for future campaigns.

**Keywords:** Primate conservation; conservation outreach; bibliometric analysis; digital media; social media.

---

\*corresponding author: Bristol Zoological Society, Clifton, Bristol, BS8 3HA  
Tel: +44(0)117 428 5477, Email: [dkerhoas@bristolzoo.org](mailto:dkerhoas@bristolzoo.org)

<sup>†</sup>Equal contribution

# 1 Introduction

2 It is widely recognised that the internet could be a useful tool to understand and explore  
3 public interest around a specific event or general issues. Large volumes of data are freely  
4 and easily accessible providing a cost effective way of analysing trends and attitudes  
5 across a broad spectrum of the public (see Proulx et al. 2014, Anderegg & Goldsmith  
6 2014, Cha & Stow 2015, Soriano-Redondo et al. 2017). For example, the developing field  
7 of culturomics examines large online databases of word frequencies using offsite metrics  
8 that can then be used to understand or predict behaviour or processes. One of the  
9 best-known examples is Google Flu Trends which utilises internet search data to track  
10 and ultimately plan responses to flu outbreaks (Dugas et al. 2013). This relies on the  
11 google search engine, the world’s most commonly used search engine with 80% of the  
12 global market share (Netmarketshare 2017). Whilst it has been argued that these online  
13 tools may have less bias than traditional methods (Soriano-Redondo et al. 2017) and are  
14 particularly effective if triangulated with other tools (Proulx et al. 2014), it should be  
15 noted that models need to be adapted. Despite historical accuracy, in 2013, Google Flu  
16 Trends did not accurately predict peak levels of flu in the US (Butler 2013).

17 Despite the growing use of digital resources in other areas, bibliometrics, social media, and  
18 internet search data are still little used in conservation research (Proulx et al. 2014, Cha  
19 & Stow 2015). A small number of studies have, however, used online sources to examine  
20 trends in public interest in environmental issues (Ficetola 2013, McCallum & Bury 2013,  
21 Soriano-Redondo et al. 2017), and monitor ecosystem services and trade (Galaz et al.  
22 2010, Ladle et al. 2016). Proulx et al. (2014), for example, tracked biological processes and  
23 distribution, e.g. pollen and spread of invasive species, and the relationship with public  
24 interest. Furthermore, online tools have been used to measure public interest (Nekaris  
25 et al. 2013) and potential changes in opinion following key media events including ‘climate  
26 gate’ and the death of Cecil the Lion (Anderegg & Goldsmith 2014, Cha & Stow 2015,  
27 Carpenter & Konisky 2017). The potential for digital data to assist with understanding  
28 support, or a lack thereof, for conservation initiatives has not been yet fully explored  
29 (Ladle et al. 2016, Soriano-Redondo et al. 2017)

30 Since 2000, the International Union for Conservation of Nature’s Species Survival Com-  
31 mission (IUCN SSC) Primate Specialist Group, the International Primatological Society,  
32 and Conservation International have biennially published the “World’s 25 Most Endan-  
33 gered Primates” (also known as “Top 25 list” or “Primates in Peril”; hereinafter referred  
34 to as “Top 25”). This report highlights twenty-five of the most threatened primate species  
35 with the aim of attracting attention and action from the scientific community, relevant  
36 governments, and the public. As such, inclusion in the list is not based on the ac-  
37 tual conservation status of the primate species, but most are also officially classified as  
38 “threatened”. The list is produced by the world’s leading primatologists and field re-  
39 searchers who have first-hand knowledge of the ongoing evolution of threats to primate  
40 species; more than 250 experts have been involved in compiling the last five iterations of  
41 the publication. The number of species included in this list is evenly distributed between  
42 4 geographical regions (Neotropics, Africa, Madagascar and Asia). Whilst the potential  
43 to increase scientific interest and raise the profile of these animals is clear, the actual  
44 impact of the Top 25 has never been tested.

45 The aim of this research is to evaluate the scientific output and media penetration of the  
46 Top 25 list. We investigated whether the inclusion of a species in the list had an influence

47 on the number of peer-reviewed articles published on that species in the following years.  
48 This is of vital importance as policy-makers and funding agencies rely mostly on scientific  
49 reports. We also examined whether the list was an effective communication tool for  
50 conservation by analysing media output following the publication of the Top 25 in 2015.

## 51 **2 Methods**

### 52 **2.1 Scientific publications**

53 We tested the impact of the mention of a species on the Top 25 list on scientific publica-  
54 tions (see Table A1 in the Online Appendix for all species included, and the year of their  
55 mentions). We have included in this analysis a total of 37 species that were mentioned  
56 at least once in the Top 25 list from 2000-2002 to 2010-2012 (6 lists overall of 25 primate  
57 species each). We excluded species that were mentioned in the lists of 2012-2014 and  
58 2014-2016 (as there is not enough post-mention data to assess the impact). Each species  
59 was considered separately and included once in the analysis.

60 We used 74 control primate species (see Table A2 in the Online Appendix) that have  
61 never been mentioned in any of the Top 25 lists released to account for a possible bias  
62 of an overall increase of publications through time. These control species were chosen  
63 randomly, with the constraint of being evenly distributed in the 4 biogeographical regions  
64 (Africa, Asia, Neotropics and Madagascar).

65 We extracted data from 40 million articles published from 1994 to 2014 in six major  
66 scientific publishers (PLOS, BMC, Elsevier, Springer, Nature and Highwire/Pubmed; see  
67 Table 1). The data were extracted from the publisher databases using custom-written  
68 python interfaces to the API they provided. We extracted all articles in which the Latin  
69 name of a species that was either included in the Top 25 list ( $n=37$  species) or of control  
70 species ( $n=74$  species). We used the Latin name for both Top 25 species and control  
71 species as the common name may have changed over the years and scientific articles  
72 always list the Latin name when a species is first mentioned. Data from the archives of  
73 these publishers were extracted in February and March 2014.

74 We used a Bayesian structural time-series model that estimates the causal effect of a  
75 designed intervention on a time series, given a baseline model of the expected trend  
76 (Brodersen et al. 2015) in R software (R Core Team 2014). For each species (Top 25 and  
77 control) we compiled a count of the number of scientific articles per year from 1994 to  
78 2014. For species mentioned more than one time in the Top 25, the intervention tested  
79 is the period of time from the first to the last mention in the list. We used the average  
80 number of scientific publications of the control species trend as baseline. We also ran  
81 the same analysis using only control species that were classified as “threatened” (IUCN,  
82 2017) as a control baseline (37 out of 74). This allows us to account for the conservation  
83 status of control species which may influence the number of publications.

84 One key assumptions of this analysis is that the set of control time series should be  
85 predictive of the outcome time series in the pre-intervention period. In our case, it is  
86 fair to assume that a general rise of publication as observed for control species is to  
87 be predicted for the species of the Top 25 before their mention in the list. A second  
88 assumption is that the control time series must not have been affected by the intervention

89 (Brodersen et al. 2015). It is unlikely that the scientific publication on a control species,  
90 never included in a Top 25 list, would be affected by the release of a biennial Top 25 list.

## 91 **2.2 Media penetration**

92 The Top 25 list for 2014-2016 was decided on the 13<sup>th</sup> of August 2014 and officially released  
93 on the 24<sup>th</sup> November 2015. We tracked, starting approximately one month before the  
94 day of the official launch and for one month after (21/10/15 to the 28/12/15), the presence  
95 of a series of keywords (the title of the list itself and related keywords, e.g. “endangered  
96 primates”, “primates in peril”, “Top 25 primates”) and the scientific and common names  
97 of the 25 primate species included in the list, (e.g. Sumatran orangutans, *Pongo abelii*  
98 and red ruffed lemur, *Varecia rubra*, cf. Table A3 in the Online Appendix) on a daily  
99 basis. The two data (title/keywords and species names) are considered separately in the  
100 analysis. We assessed the penetration of the Top 25 in traditional media (tracked through  
101 Google News), social media (through Twitter), blogs (through Google Blogs Search), and  
102 the interest of the general public (tracked through Google Trends). Google News is a  
103 free news aggregator that selects syndicated web content such as online newspapers in  
104 one location for easy viewing. Twitter is a social network where users post messages that  
105 can be read by an unregistered person and it has more than 319 million monthly active  
106 users as of 2016. Google Blog Search is a service to search blogs content with an identical  
107 process to Google Search. Google Trends, that provides data on individual searches in  
108 Google, shows how often a term is searched for relative to the total number of searches  
109 worldwide.

110 As in the previous analysis, we used a Bayesian time series analysis (Brodersen et al.  
111 2015). In this analysis we did not consider any control species given that we did not  
112 expect any general increasing trend as we did for the scientific publications. We ran  
113 the analysis for a post intervention period both of one week and one month, in order to  
114 examine the duration of the possible effect.

115 The data used in the analysis are available in an Open Science Framework repository at  
116 <https://osf.io/e7ymv/>

## 117 **3 Results**

### 118 **3.1 Scientific publications**

119 We found 4,545 scientific articles that contained at least once the Latin name of the 37  
120 primate species that were included in one of the six Top 25 lists from 2000-2002 to 2010-  
121 2012. In addition, 13,656 scientific articles contained at least once the Latin name of the  
122 74 primate control species.

123 Twenty two out of 37 species (59%) had an increase in scientific publications follow-  
124 ing their inclusion in the Top 25 list (Figure 1). For 11 species there was no identified  
125 effect, and 4 species had a decrease in publications following inclusion in the Top 25  
126 list. The four species with the most positive impact were the mountain gorilla (*Gorilla*  
127 *beringei beringei*), the drill (*Mandrillus leucophaeus*), the golden lion tamarin (*Leontop-*  
128 *ithecus rosalia*) and the black snub-nosed monkey (*Rhinopithecus bieti*). The four species  
129 that suffered a decline in publication were the brown spider monkey (*Ateles hybridus*

130 *brunneus*), the Miller’s langur (*Presbytis hosei canicrus*), Miss Waldron’s red colobus  
131 (*Procolobus badius waldroni*) and the north-west Bornean orangutan (*Pongo pygmaeus*  
132 *pygmaeus*). There were no significant differences between species mentioned once (n=21)  
133 or several times (n=16) in the Top 25 list (two-tailed Mann-Whitney U-test, U=173,  
134  $p=0.8916$ ; Figure A1 the in Online Appendix).

135 When using only the control species that were classified as “threatened” (IUCN, 2017) as  
136 a baseline to control for publication bias the results were even stronger, with 25 species  
137 out of 37 (67.6%) demonstrating an increase in publication rates following their inclusion  
138 in the Top 25 list (Figure A2 in the Online Appendix). Twelve species were not affected by  
139 their mention in the list and none suffered a decrease in presences in scientific publications  
140 after inclusion on the Top 25 list.

## 141 **3.2 Media penetration**

### 142 **3.2.1 Google News**

143 During the pre-intervention period, we collected a total of 296 mentions of the Latin name  
144 of the species included in the Top 25 list and 27 mentions of the title/keywords. During  
145 the post-intervention period, Latin name of species in the Top 25 list were mentioned 427  
146 times and the keywords 161 times.

147 When considering a post period of one week, we found a net significant increase of men-  
148 tions of the common or Latin name of species included in the 2012-2014 Top 25 Most  
149 Endangered Primate list (Table 2). However, with a post-intervention period of one  
150 month, although the intervention appears to have caused a positive effect, this effect is  
151 not statistically significant (Figure 2).

152 When we considered the keywords associated with the Top 25 list we found that there  
153 was a significant effect of the official launch on the use of these keywords in Google News,  
154 both considering a post-intervention period of one week and of one month (Table 3).

### 155 **3.2.2 Google Blogs**

156 The Latin name of the species included in the Top 25 list and keywords relating to the list  
157 were both mentioned only once during the pre-intervention period in Google Blogs. During  
158 the post-intervention period, Latin name of species in the Top 25 list were mentioned 65  
159 times, and the keywords 88 times.

160 We found that with both a short and long post-intervention period there was a significant  
161 effect of the Top 25 list official launch on the mention of Latin and common names of  
162 species (Table 2) on the use keywords (Table 3) included in this list (Figure 2).

### 163 **3.2.3 Twitter**

164 Latin and common name of species were included in tweets 621 times during the pre-  
165 intervention period. Keywords associated with the Top 25 list were sporadically used in  
166 comparison, with a total of 33 tweets. For the post-intervention period, there were 768

167 mentions in tweets including Latin or common names of species included in the Top 25  
168 list and 622 mentions of the Top 25 associated keywords.

169 Our analysis of the number of tweets and retweets following the Top 25 list launch in 2015  
170 yielded similar results to Google News (Figure 2). When considering the species name  
171 there was an effect of the launch on mentions on twitter in the one week-post intervention  
172 period, but no effect in the one month period (Table 2). The analyses on keywords yield  
173 significant results for both period lengths (Table 3).

#### 174 **3.2.4 Google Trends**

175 After looking up on Google Trends the different species included on the Top 25 2014-2016  
176 (using either the scientific and common names), we find that there was no impact of the  
177 Top 25 being released on the number of individual searches in Google. In fact, there were  
178 too few individual searches on Google to use this dataset in further analysis. Thus we did  
179 not analysed further using the data extracted on Google Trends.

## 180 **4 Discussion**

181 We found that inclusion in the “World’s 25 Most Endangered Primates” list had a positive  
182 effect on the number of scientific papers published on the featured primate species. This is  
183 encouraging, and it suggests that the use of this type of report can drive scientific interest  
184 for these threatened species. Furthermore, as policy-makers and funding agencies rely on  
185 scientific reports, this could have a direct positive impact on the conservation of these  
186 primates. This result is, in some ways, unsurprising as some of the scientists publishing  
187 on these species are going to be those who contribute to the formulation of the Top 25  
188 list. It is difficult to untangle the direction of impact e.g., is inclusion driving publications  
189 or is the author’s involvement with the list driving inclusion? The lack of causal inference  
190 is a recognized limitation with this type of online data (Proulx et al. 2014, Nghiem et al.  
191 2016) and suggests the need for further research.

192 The primate species that suffer a decrease of publications following the inclusion are from  
193 two distinct regions, namely the Neotropics and Asia. The inclusion on the list of an  
194 ape species is found to either improve greatly or decrease scientific publications on these  
195 species (respectively the mountain gorilla and the north-west Bornean orangutan).

196 Examination of media penetration highlighted a significant increase in news articles fo-  
197 cusing on species included in the Top 25 list, but this was not sustained for a month after  
198 publication of the report. This has also been seen in other studies where there tends to  
199 be a short term interest in the issue that is not sustained e.g., the killing of Cecil the  
200 lion (Carpenter & Konisky 2017) or media events regarding climate change (Anderegg &  
201 Goldsmith 2014). The short spike of interest might be due to high news turnover.

202 Interestingly, there was a significant increase in attention in Google Blogs for species that  
203 had been included in the Top 25 list. This result may mostly be due to the absence of  
204 any keywords and species name in the pre-period. Thus, even with a few mentions in any  
205 blogs found in Google after the official launch, the analysis may yield a significant effect of  
206 the intervention on the data collected. The sustained interest, i.e., after one month, may  
207 also be a reflection of the longer timeframe required to extract information from news

208 sites, write and publish blogs. However, it also suggests that direct engagement with  
209 key influencers and bloggers would have potential to increase the reach of news regarding  
210 key conservation events. We found too few data points on Google Trends to justify an  
211 analysis. This may mean that the general reader about the Top 25 online either already  
212 know the list or do not research its meaning on Google.

213 This result was also seen in the social media analysis where there was an increase in  
214 attention on included species one week after launch of the Top 25 list. However, we do  
215 not know whether there was a long term interest within the social media sphere. In fact,  
216 conservationists need to understand how to use social media effectively and engage with  
217 their audience (Papworth et al. 2015). Simply releasing reports or updates on to Twitter is  
218 not enough for a sustained impact and suggests there is the need to intensify engagement  
219 and support with a social media friendly communication tool (such as videos). It also  
220 requires the collaboration of conservation partners and scientists to gain any traction  
221 within social media. In its current form, the Top 25 list is, therefore, not effective as a  
222 communication tool to the public. However, with a more structured, multiple release to a  
223 developed online community we believe its impact could be improved. The use of onsite  
224 metrics will also be important to understand public interest and improve conservation  
225 information penetration (Soriano-Redondo et al. 2017)

226 In conclusion, use of offsite metrics to examine the impact of a conservation intervention  
227 provides an important insight into scientific and public interest. This is necessary to  
228 drive future communication in this area (Anderegg & Goldsmith 2014, Nghiem et al.  
229 2016) However, there are limitations of this method which need to be taken into account  
230 (Ladle et al. 2016). For example, the reliance on English speaking search engines has  
231 the potential to skew the data as there are other online tools used extensively in other  
232 countries; whilst Baidu has only a 6% global market share, it has 70% of the market share  
233 in China (Statcounter 2017).

234 The “World’s 25 Most Endangered Primates” publication appears to fulfil its aim on  
235 attracting attention and action from the scientific community. It has a positive impact on  
236 scientific publications and, by association, research into these threatened species. Impact  
237 on governments is harder to ascertain and was not the focus of this study. There seems to  
238 be little impact, however, on attracting the attention of the general public and we would  
239 suggest that this becomes a focus of the publishing team going forward.

## 240 **Acknowledgements**

241 This work has been funded by the Bristol Zoological Society and by the Margot Marsh  
242 Biodiversity Foundation. We are grateful to Anna Egerton, Alexia Balatsoukas and Claire  
243 Drury.

## 244 **References**

245 Anderegg, W. R. & Goldsmith, G. R. (2014), ‘Public interest in climate change over the  
246 past decade and the effects of the ‘climategate’ media event’, *Environmental Research  
247 Letters* **9**(5), 054005.

- 248 Brodersen, K. H., Gallusser, F., Koehler, J., Remy, N., Scott, S. L. et al. (2015), ‘Inferring  
249 causal impact using bayesian structural time-series models’, *The Annals of Applied  
250 Statistics* **9**(1), 247–274.
- 251 Butler, D. (2013), ‘When google got flu wrong’, *Nature* **494**(7436), 155.
- 252 Carpenter, S. & Konisky, D. M. (2017), ‘The killing of cecil the lion as an impetus for  
253 policy change’, *Oryx* pp. 1–9.
- 254 Cha, Y. & Stow, C. A. (2015), ‘Mining web-based data to assess public response to  
255 environmental events’, *Environmental pollution* **198**, 97–99.
- 256 Dugas, A. F., Jalalpour, M., Gel, Y., Levin, S., Torcaso, F., Igusa, T. & Rothman, R. E.  
257 (2013), ‘Influenza forecasting with google flu trends’, *PloS one* **8**(2), e56176.
- 258 Ficetola, G. F. (2013), ‘Is interest toward the environment really declining? the com-  
259 plexity of analysing trends using internet search data’, *Biodiversity and conservation*  
260 **22**(12), 2983–2988.
- 261 Galaz, V., Crona, B., Daw, T., Bodin, Ö., Nyström, M. & Olsson, P. (2010), ‘Can web  
262 crawlers revolutionize ecological monitoring?’, *Frontiers in Ecology and the Environ-  
263 ment* **8**(2), 99–104.
- 264 Ladle, R. J., Correia, R. A., Do, Y., Joo, G.-J., Malhado, A. C., Proulx, R., Roberge,  
265 J.-M. & Jepson, P. (2016), ‘Conservation culturomics’, *Frontiers in Ecology and the  
266 Environment* **14**(5), 269–275.
- 267 Mccallum, M. L. & Bury, G. W. (2013), ‘Google search patterns suggest declining interest  
268 in the environment’, *Biodiversity and conservation* **22**(6-7), 1355–1367.
- 269 Nekaris, K. A.-I., Campbell, N., Coggins, T. G., Rode, E. J. & Nijman, V. (2013), ‘Tickled  
270 to death: analysing public perceptions of ‘cute’ videos of threatened species (slow  
271 lorises–nycticebus spp.) on web 2.0 sites’, *PloS one* **8**(7), e69215.
- 272 Netmarketshare (2017), ‘Market share reports: search engines’, available at: [www.  
273 netmarketshare.com](http://www.netmarketshare.com).
- 274 Nghiem, L. T., Papworth, S. K., Lim, F. K. & Carrasco, L. R. (2016), ‘Analysis of the  
275 capacity of google trends to measure interest in conservation topics and the role of  
276 online news’, *PloS one* **11**(3), e0152802.
- 277 Papworth, S. K., Nghiem, T., Chimalakonda, D., Posa, M. R. C., Wijedasa, L., Bickford,  
278 D. & Carrasco, L. R. (2015), ‘Quantifying the role of online news in linking conservation  
279 research to facebook and twitter’, *Conservation Biology* **29**(3), 825–833.
- 280 Proulx, R., Massicotte, P. & PÉpino, M. (2014), ‘Googling trends in conservation biology’,  
281 *Conservation Biology* **28**(1), 44–51.
- 282 R Core Team (2014), *R: A Language and Environment for Statistical Computing*, R  
283 Foundation for Statistical Computing, Vienna, Austria.
- 284 Soriano-Redondo, A., Bearhop, S., Lock, L., Votier, S. C. & Hilton, G. M. (2017),  
285 ‘Internet-based monitoring of public perception of conservation’, *Biological conservation*  
286 **206**, 304–309.
- 287 Statcounter (2017), ‘Search engine market share in china.’, available at: [http://gs.  
288 statcounter.com/search-engine-market-share/all/china](http://gs.statcounter.com/search-engine-market-share/all/china).



| Publishers name | Search type | Total articles searched | Top 25 species match | Control species match |
|-----------------|-------------|-------------------------|----------------------|-----------------------|
| PLOS            | Full text   | 53,500                  | 213                  | 148                   |
| BMC             | Full text   | 189,955                 | 149                  | 132                   |
| Elsevier        | Full text   | 11,000,000              | 4,265                | 6,805                 |
| Springer        | Keywords    | 5,000,000               | 66                   | 36                    |
| Nature          | Full text   | 500,000                 | 211                  | 259                   |
| HighWire/PubMed | Full text   | 23,000,000              | 2,565                | 6,276                 |
| <b>Total</b>    |             | <b>39,743,455</b>       | <b>7,469</b>         | <b>13,656</b>         |

Table 1: **List of publishers used for the data mining analysis on scientific publication.** Search of the species name (either Top 25 species or control) was done either on the full text or on the keywords of scientific articles.

| Media type | Post-intervention period | Absolute average effect | Absolute cumulative effect | Relative effect in % |
|------------|--------------------------|-------------------------|----------------------------|----------------------|
| News       | month                    | 3.5 [-3.5, 11]          | 121.5 [-122.6, 393]        | 40 [-40, 129]        |
|            | week                     | 36 [24, 48]             | 291 [189, 381]             | 415 [269, 543]       |
| Blogs      | month                    | 1.8 [1.7, 1.9]          | 64.0 [61.1, 67.0]          | 6342 [6058, 6639]    |
|            | week                     | 7.1 [7, 7.2]            | 56.8 [56, 57.8]            | 24296 [23834, 24748] |
| Twitter    | month                    | 4 [-3.4, 11]            | 141 [-119.8, 399]          | 23 [-19, 64]         |
|            | week                     | 17 [3.6, 29]            | 133 [28.5, 230]            | 93 [20, 160]         |

Table 2: **Latin and Common species names in media.** Causal impact analysis results for search of Latin and Common species included in the Top 25 list 2012-2014 on Google News, Google Blogs and Twitter with a pre-period before the official launch of one month and a post-intervention period after the official launch of either one month or one week. The absolute average effect is the estimated average causal effect across post-intervention period. The absolute cumulative effect is determined as the difference between the predicted and actual value, i.e., the additional publications following the inclusion in the Top 25 list. The relative effect shows the percentage of increase or decrease following the intervention from the predicted values. All effects are reported with their 95% CI.

| Media type | Post-intervention period | Absolute average effect | Absolute cumulative effect | Relative effect in % |
|------------|--------------------------|-------------------------|----------------------------|----------------------|
| News       | month                    | 3.8 [3.4, 4.2]          | 1133.2 [117.7, 148.2]      | 480 [424, 534]       |
|            | week                     | 17 [16, 17]             | 134 [128, 139]             | 2100 [2015, 2182]    |
| Blogs      | month                    | 2.5 [2.4, 2.5]          | 86.1 [83.2, 88.9]          | 4446 [4295, 4590]    |
|            | week                     | 11 [11, 11]             | 86 [84, 87]                | 19152 [18901, 19379] |
| Twitter    | month                    | 17 [16, 17]             | 588 [568, 610]             | 1726 [1666, 1790]    |
|            | week                     | 44 [43, 45]             | 350 [343, 358]             | 4486 [4394, 4587]    |

**Table 3: Top 25 related keywords in media.** Causal impact analysis results for search of keywords (e.g. top 25 primates, primate in peril) included in the Top 25 list 2012-2014 on Google News, Google Blogs and Twitter with a pre-period before the official lunch of one month and a post-intervention period after the official launch of either one month or one week. The absolute average effect is the estimated average causal effect across post-intervention period. The absolute cumulative effect is determined as the difference between the predicted and actual value, i.e., the additional publications following the inclusion in the Top 25 list. The relative effect shows the percentage of increase or decrease following the intervention from the predicted values. All effects are reported with their 95% CI.

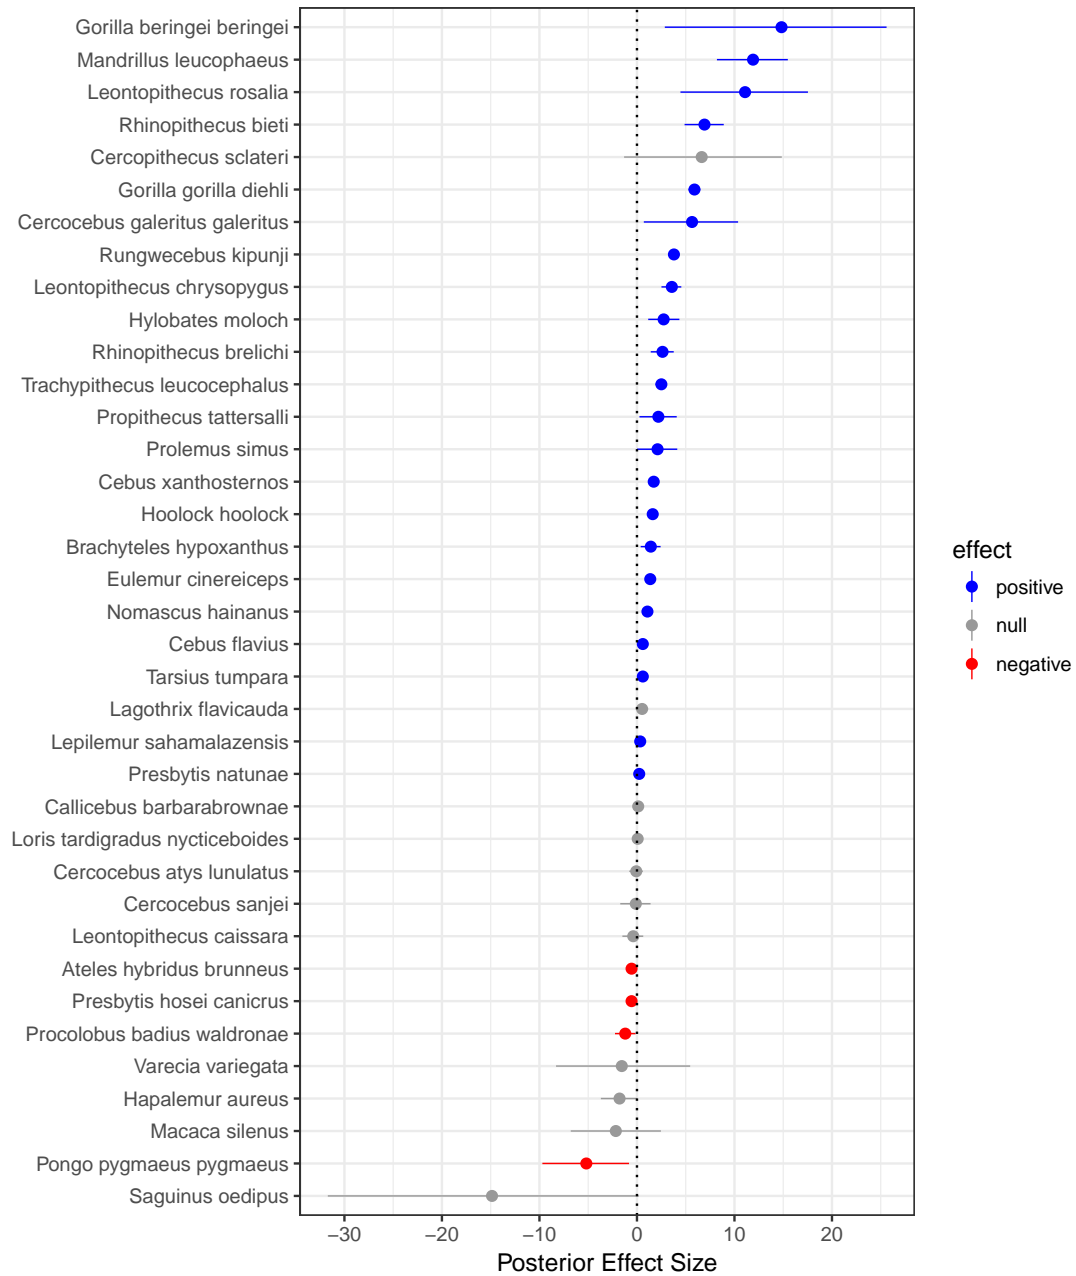

Figure 1: **Effect of Top 25 inclusion on scientific publications.** Posterior effect size of Causal Impact analysis for each Top 25 primate species included in the 6 Top 25 lists from 2000-2002 to 2010-2012 on scientific publications containing at least once their Latin names. Effect size containing only positive values are in blue, containing both positive and negative value are in grey and containing only negative value are in red.

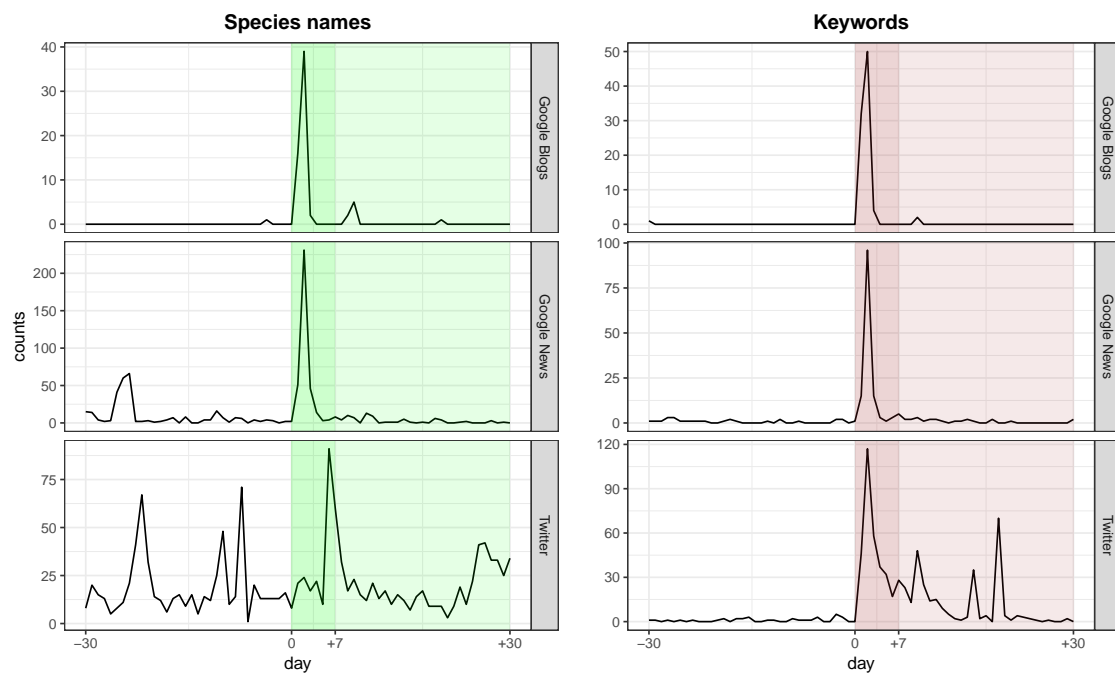

Figure 2: **Effect of Top 25 inclusion on media.** Counts of mentions on Google Blogs, Google News and Twitter of Latin name species and keywords related to the list one month before and one month after the official launch of the Top 25 list (24th of November 2015). The post-intervention period (following the launch) of one month and of one week are highlighted.
